# Supplementary material for: Understanding for whom, under what conditions, and how group-based physical activity interventions are successful: a realist review
Source: Springer Nature journal article supplement (doi:10.1186/s12889-015-2270-8), 2015-09-24
Supplement: MOESM1 [file 9750374]

*Supplemental Table*

Inclusion criteria for articles

| <b>Data type</b>                                          | <b>Inclusion criteria</b>                                                                                             |
|-----------------------------------------------------------|-----------------------------------------------------------------------------------------------------------------------|
| Participants                                              | - >17 years of age                                                                                                    |
| Language                                                  | - Available in English language                                                                                       |
| Study design                                              | - Used experimental or quasi-experimental design<br>- Qualitative analysis of a physical activity intervention        |
| Control condition                                         | - Any comparator including active control, inactive control, or pre and post-measure                                  |
| Intervention                                              | - Explicit statement of the use of at least one group-based strategy                                                  |
| Primary outcome(s)<br>(at least one of these<br>outcomes) | - Physical activity<br>- Exercise<br>- Fitness<br>- Adherence<br>- Qualitative measure of physical activity behaviors |
